# Supplementary material
Source: PubMed Central journal article supplement (PMC4363442)
Supplement: IAI.01713-14_zii999090814so1.pdf [file IAI.01713-14_zii999090814so1.pdf]

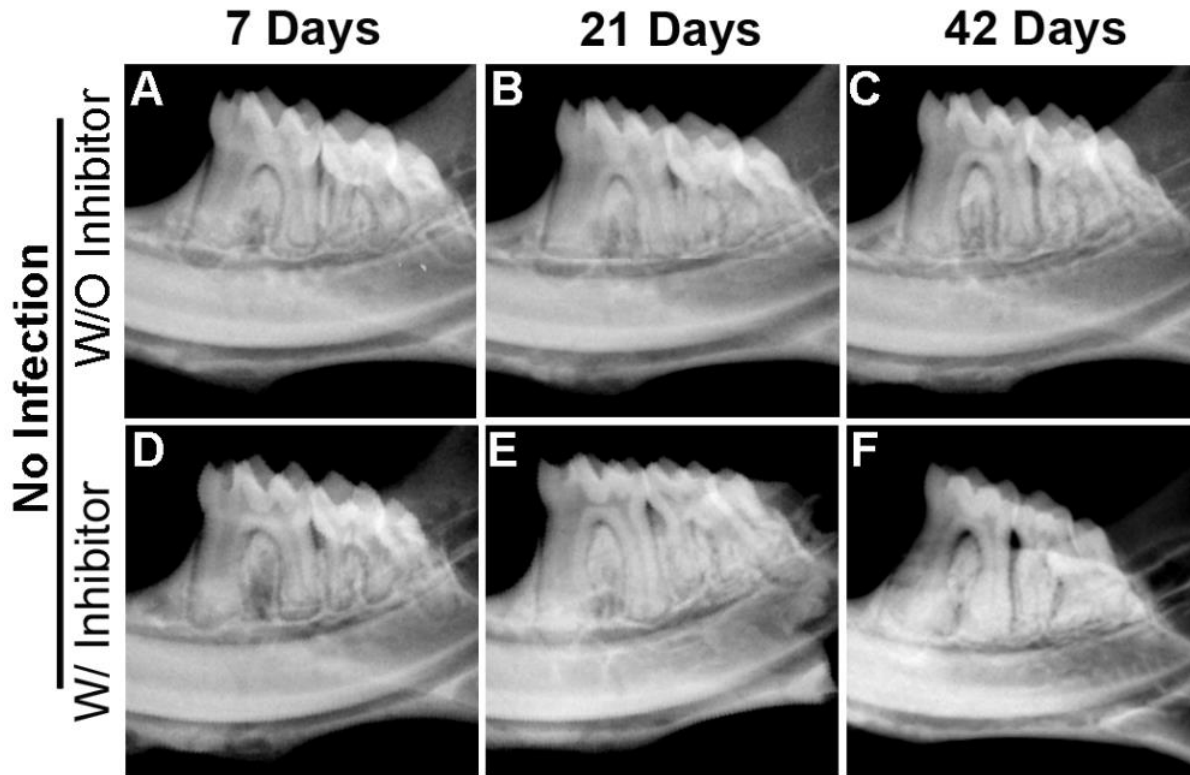

1  
2 **Figure S1. Inhibition of Ctsk by specific inhibitor of normal group in endodontic**  
3 **and furcation area at different time points by X-ray analysis. (A-C)** X-ray imaging of  
4 the first molar tooth of the normal group without inhibitor at different time points (7, 21  
5 and 42 days). **(D-F)** X-ray imaging of the first molar tooth of the normal group with  
6 inhibitor (3.606 mg/kg/wk) at different time points (7, 21 and 42 days). There was no  
7 reduced bone density area in the normal group. N = 3, repeated three times.

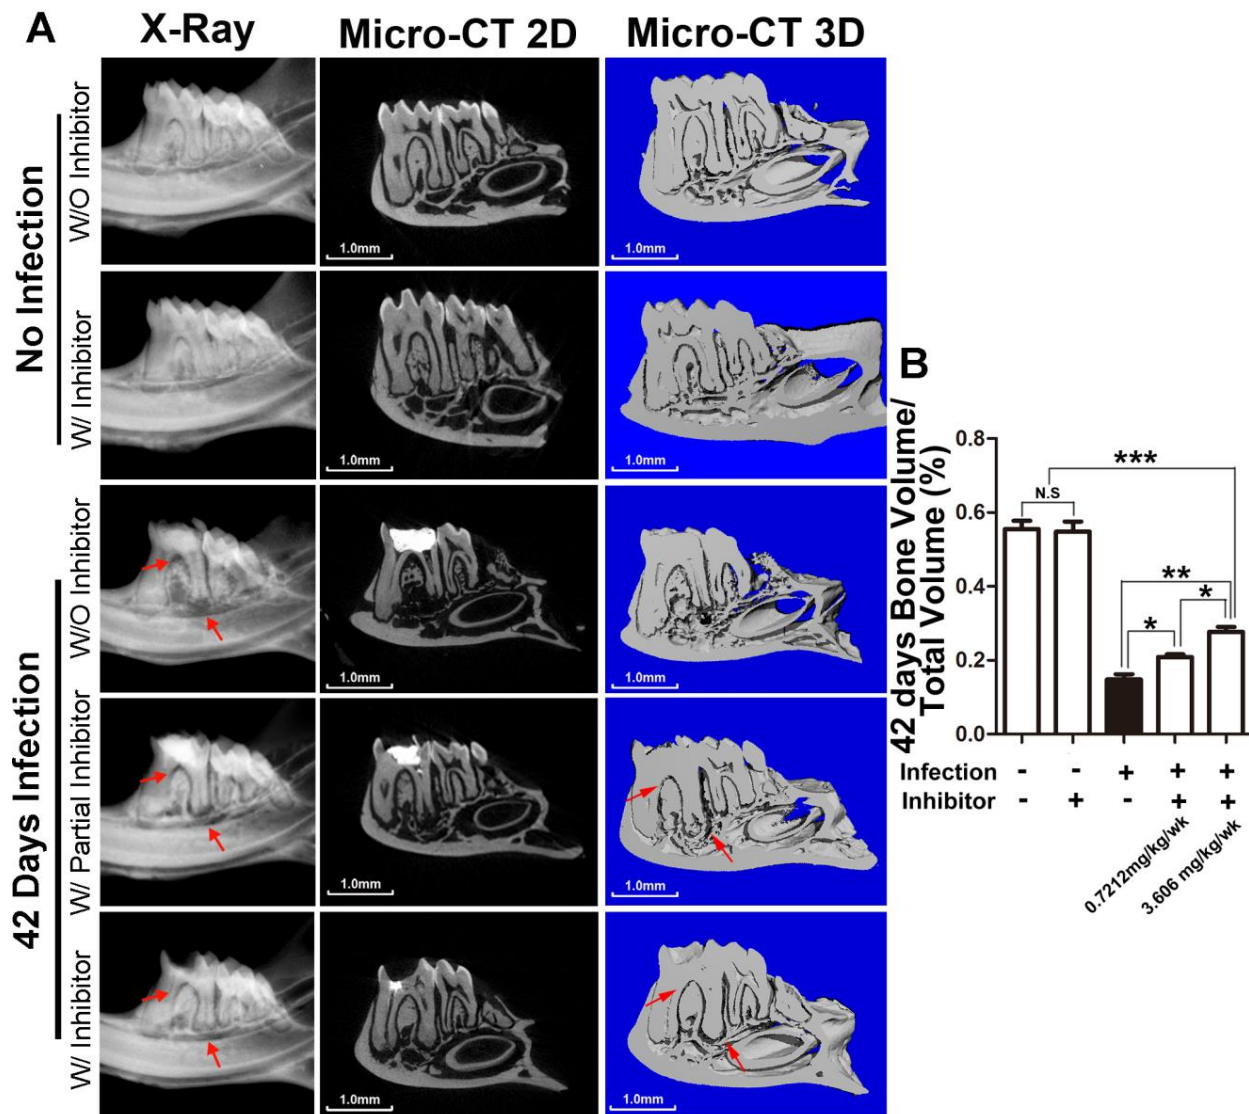

16

17 **Figure S2. Inhibition of Ctsk by specific inhibitor of different dose reduced infection-**  
 18 **stimulated endodontic bone resorption by Micro-computed tomography ( $\mu$ CT)**  
 19 **analysis. (A)  $\mu$ CT analysis of endodontic area of normal group without or with inhibitor**  
 20 **(3.606 mg/kg/wk) at 42 days. (B)  $\mu$ CT analysis of endodontic lesion area of bacterial**  
 21 **infected group with inhibitor (3.606 mg/kg/wk) or (0.7212mg/kg/wk) at 42 days. (C)**  
 22 **Quantification of bone volume/total volume measured for periapical lesion area from**  
 23 **bacteria infected group without and with inhibitor (3.606 mg/kg/wk) or (0.7212mg/kg/wk)**  
 24 **at 42 days. \*:  $P < 0.05$ , \*\*:  $P < 0.01$ , \*\*\*:  $P < 0.001$ . N.S: No Significance. N = 3, repeated**  
 25 **three times. Left column of panel A are X-ray images. Middle column of panel A are**

26 typical slice 2D  $\mu$ CT images, while the right column of panel **A** are 3D reconstitutions  
27 images.

28  
29  
30  
31  
32  
33  
34  
35  
36  
37  
38  
39  
40  
41  
42  
43  
44  
45  
46  
47  
48  
49  
50  
51  
52  
53  
54  
55  
56

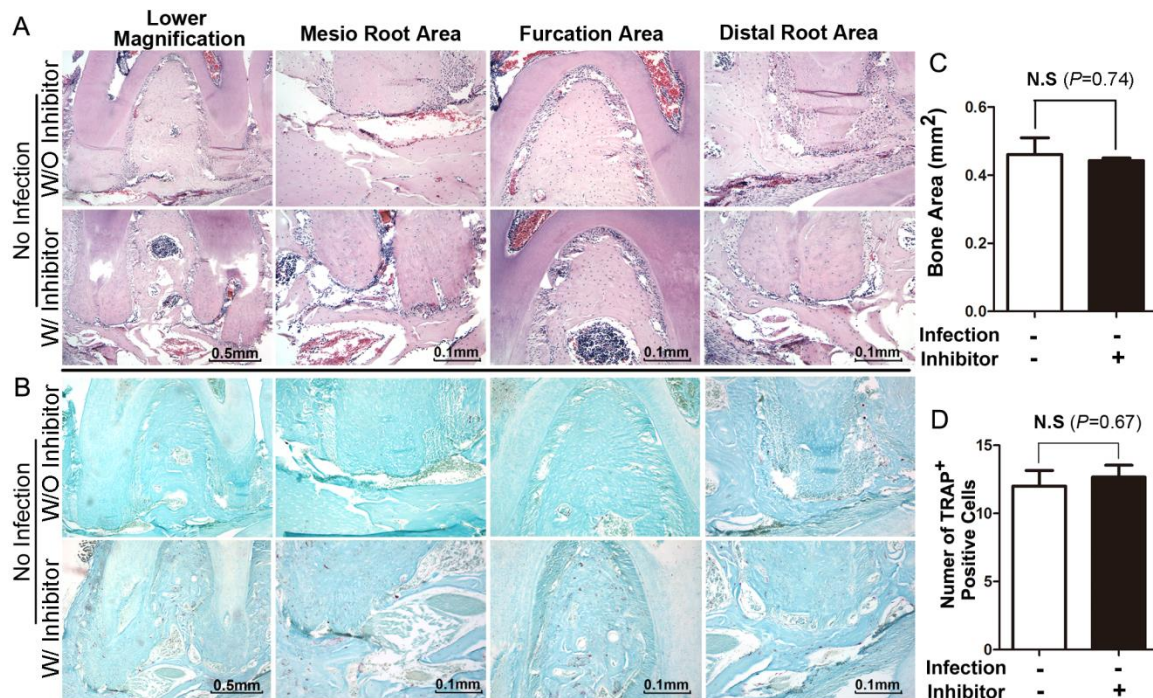

57  
 58 **Figure S3. H&E and TRAP stain of periapical and furcation area of normal group. (A)**  
 59 H&E staining of the periapical mesio, distal root sections and furcation area sections  
 60 from normal group with or without inhibitor (3.606 mg/kg/wk) at day 42. **(B)** TRAP  
 61 staining of the periapical mesio, distal root sections and furcation area sections from  
 62 normal group with or without inhibitor (3.606 mg/kg/wk). **(C)** Quantification of bone area  
 63 at normal group with or without inhibitor (3.606 mg/kg/wk). **(D)** Quantification of TRAP<sup>+</sup>  
 64 cells at normal group with or without inhibitor (3.606 mg/kg/wk). N.S: No Significance. N  
 65 = 3, repeated three times.

66  
 67  
 68  
 69  
 70  
 71  
 72  
 73

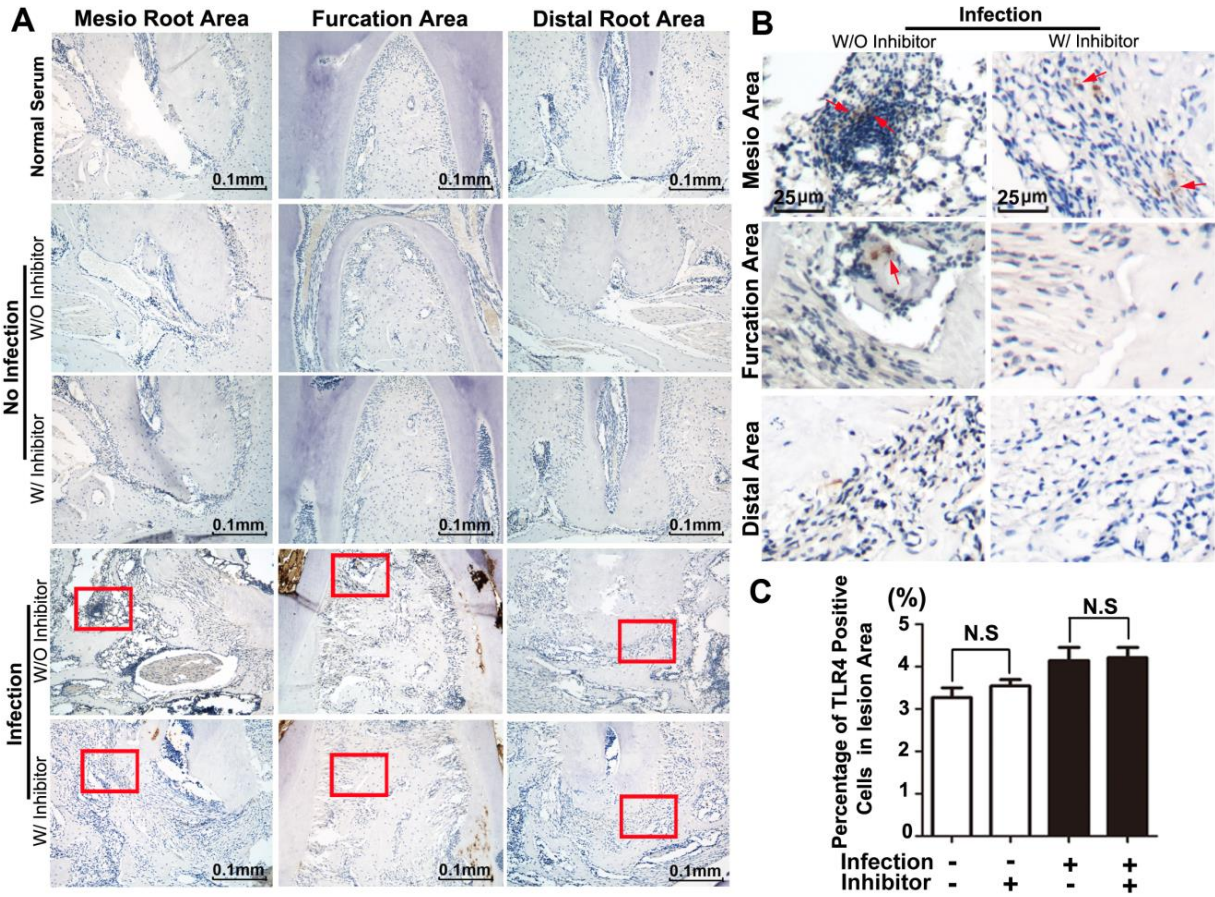

74

75 **Figure S4. Inhibition of Ctsk by specific inhibitor showed no effect on expression of**  
 76 **TLR4 in periapical lesion area at 42 days by immunohistological analysis. (A)**  
 77 **Immunohistochemistry stains of TLR4<sup>+</sup> (Brown) cells areas in normal group and**  
 78 **bacterial infected group with or without inhibitor (3.606 mg/kg/wk) at 42 days. Normal**  
 79 **serum served as negative control. (B) Higher magnification view of infection disease**  
 80 **group and ODN treated disease group at 42 days. Red arrows indicated TLR4<sup>+</sup> cells.**  
 81 **(C) Quantification of TLR4<sup>+</sup> cells in frucation, mesio and distal periapical area of normal**  
 82 **group and bacterial infected group with or without inhibitor (3.606 mg/kg/wk) at 42 days.**  
 83 **N.S: No Significance. N = 3, repeated three times.**

84

85

86

87

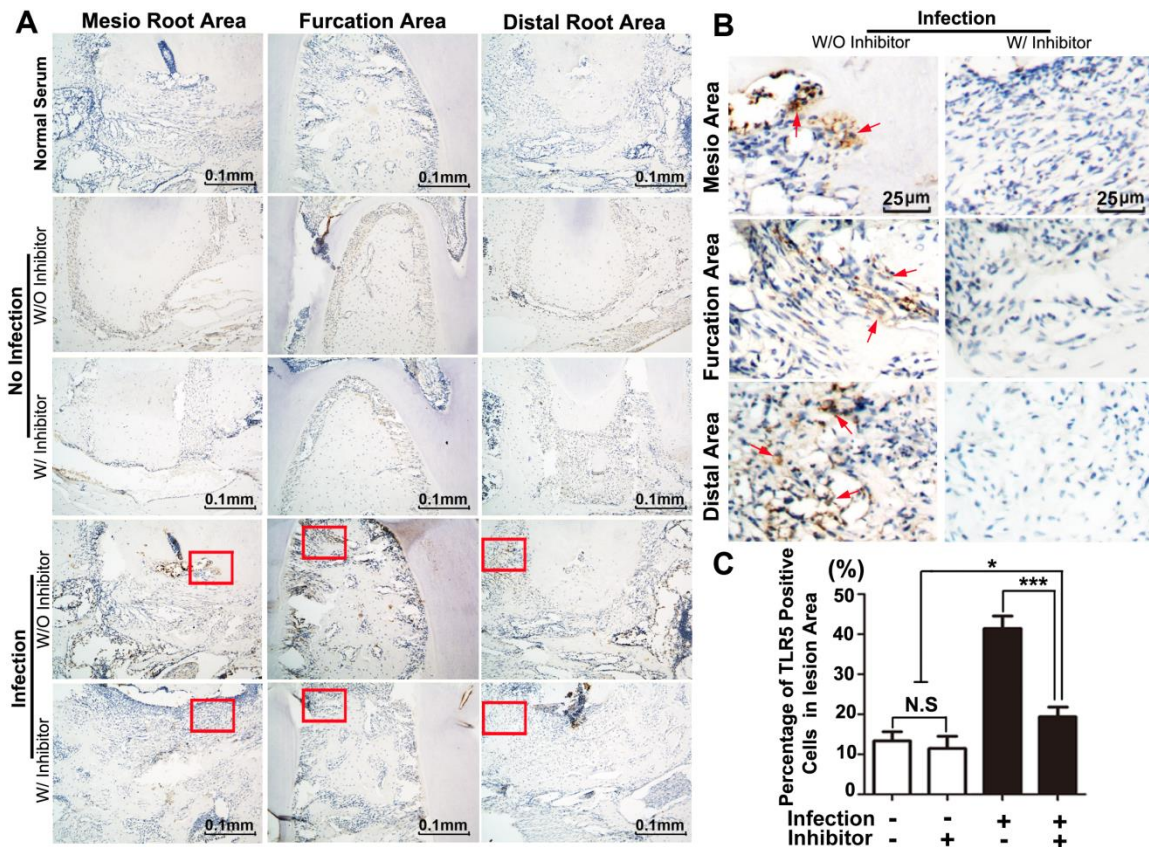

88

89 **Figure S5. Inhibition of Ctsk by specific inhibitor showed reduced expression of**  
 90 **TLR5 in periapical lesion area at 42 days by immunohistological analysis. (A)**  
 91 **Immunohistochemistry stains of TLR5<sup>+</sup> (Brown) cells areas in normal group and**  
 92 **bacterial infected group with or without inhibitor (3.606 mg/kg/wk) at 42 days. Normal**  
 93 **serum served as negative control. (B) Higher magnification view of infection disease**  
 94 **group and ODN treated disease group at 42 days. Red arrows indicated TLR5<sup>+</sup> cells.**  
 95 **(C) Quantification of TLR5<sup>+</sup> cells in frucation, mesio and distal periapical area of normal**  
 96 **group and bacterial infected group with or without inhibitor (3.606 mg/kg/wk) at 42 days.**  
 97 **\*:  $P < 0.05$ , \*\*\*:  $P < 0.001$ . N.S: No Significance. N = 3, repeated three times.**

98

99

100

101

102

103 **Table S1. Primers used for qRT-PCR**

| Gene Symbol                   | Primers used for qRT-PCR  |                          |
|-------------------------------|---------------------------|--------------------------|
|                               | Forward Primers (5'-3')   | Reverse Primers (5'-3')  |
| <i>Ctsk</i>                   | ATACGTTACTCCAGTCAAGAACCAG | TAATTCTCAGTCACACAGTCCACA |
| <i>TNF<math>\alpha</math></i> | AGGGTCTGGGCCATAGAACT      | CCACCACGCTCTTCTGTCTAC    |
| <i>IL6</i>                    | CTCTGCAAGAGACTTCCATCCAGT  | GAAGTAGGGAAGGCCGTGG      |
| <i>IL23</i>                   | ATGCTGGATTGCAGAGCAGTA     | ACGGGGCACATTATTTTTAGTCT  |
| <i>TLR4</i>                   | ACCTGGCTGGTTTACACGTC      | CTGCCAGAGACATTGCAGAA     |
| <i>TLR5</i>                   | GCCACATCATTTCCACTCCT      | ACAGCCGAAGTTCCAAGAGA     |
| <i>TLR9</i>                   | TTCTCAAGACGGTGGATCGC      | GCAGAGGGTTGCTTCTCACG     |

104
